1           **Role of oxygen consumption in hypoxia protection by translation factor depletion**

2  
3  
4           Barbara Scott<sup>1</sup>, Chun-Ling Sun<sup>1</sup>, Xianrong Mao<sup>1</sup>, Cong Yu<sup>1</sup>, Bhupinder P.S. Vohra<sup>3,\*</sup>, Jeffrey  
5           Milbrandt<sup>3,4</sup>, and C. Michael Crowder<sup>1,2,4,#</sup>

6  
7           Departments of Anesthesiology<sup>1</sup>, Developmental Biology<sup>2</sup>, and Genetics<sup>3</sup>  
8           HOPE Center for Neurological Disorders<sup>4</sup>  
9           Washington University School of Medicine  
10           St. Louis, Missouri, USA  
11

12   Running Title: Translation and hypoxic survival

13   \* - Present address: Department of Biology, University of Central Arkansas, Conway, AR 72034

14   #- Corresponding author:   C. Michael Crowder  
15                                    Department of Anesthesiology  
16                                    Washington University School of Medicine  
17                                    660 South Euclid Avenue  
18                                    St. Louis, Missouri 63110  
19                                    [crowderm@morpheus.wustl.edu](mailto:crowderm@morpheus.wustl.edu)  
20                                    Tel: 01-314-362-8560  
21                                    FAX: 01-314-362-8579  
22  
23

24  
25  
26   Word count: Abstract – 200 words; Introduction, Materials and Methods, Results, Discussion –  
27   4635 words

28  
29   Key words: Hypoxia, ischemia, translation factors, *C. elegans*

30 **SUMMARY**

31

32 Reduction of protein synthesis has been associated with resistance to hypoxic cell death. Which  
33 components of the translation machinery control hypoxic sensitivity and the precise  
34 mechanism has not been systematically investigated although a reduction in oxygen  
35 consumption has been widely assumed to be the mechanism. Using genetic reagents in *C.*  
36 *elegans*, we examined the effect on organismal survival after hypoxia of knockdown of ten  
37 factors functioning at the three principal steps in translation. Reduction-of-function of all ten  
38 translation factors significantly increased hypoxic survival to varying degrees, not fully  
39 accounted for by the level of translational suppression. Measurement of oxygen consumption  
40 found that strong hypoxia resistance was possible without a significant decrease in oxygen  
41 consumption. Hypoxic sensitivity had no correlation with lifespan or reactive oxygen species  
42 sensitivity, two phenotypes associated with reduced translation. Resistance to tunicamycin,  
43 which produces misfolded protein toxicity, was the only phenotype that significantly correlated  
44 with hypoxic sensitivity. Translation factor knockdown was also hypoxia protective for mouse  
45 primary neurons. These data show that translation factor knockdown is hypoxia protective in  
46 both *C. elegans* and mouse neurons and that oxygen consumption does not necessarily  
47 determine survival; rather, mitigation of misfolded protein toxicity is more strongly associated  
48 with hypoxic protection.

49

## 50 INTRODUCTION

51 The sensitivity of metazoan cells to injury from reduced oxygen (hypoxia) varies greatly  
52 among cell types and organisms. Only minutes of severe hypoxia is sufficient to kill human  
53 central nervous system neurons or myocardial myocytes while human skeletal myocytes can  
54 survive hours of complete ischemia. Cancer cells are typically hypoxia resistant, a trait that may  
55 contribute to their tumorigenicity and metastatic potential (Brahimi-Horn et al., 2007; Wouters  
56 and Koritzinsky, 2008; Kim et al., 2009; Rockwell et al., 2009). At an organismal level, perhaps  
57 best studied are certain hibernating animals that become profoundly resistant to hypoxia  
58 during hibernation. In both cancer cells and hibernating animals, suppression of protein  
59 translation rate is associated with adaptation to hypoxia (van den Beucken et al., 2006; Arimoto  
60 et al., 2008; Spriggs et al., 2010; Storey and Storey, 2010).

61 Protein translation is a highly energy-consuming process, accounting for a significant  
62 proportion of total cellular oxygen consumption (Rolfe and Brown, 1997). The lower oxygen  
63 consumption that accompanies a reduction in global translation rate has been assumed to be  
64 the primary mechanism whereby translational suppression protects from hypoxic injury.  
65 However, translational suppression not only reduces oxygen consumption but has other  
66 potentially protective effects. One such effect is improved protein homeostasis by decreased  
67 synthesis of nascent polypeptides that are a source of misfolded proteins (Guerriero and  
68 Brodsky, 2012).

69 In *C. elegans*, we have performed screens for genes whose mutant phenotype is  
70 improved organismal survival after hypoxia (Scott et al., 2002; Anderson et al., 2009; Mabon et  
71 al., 2009). Each of these screens has identified genes known to regulate protein homeostasis.  
72 Most recently, in a forward mutagenesis screen, *gc47*, a partial reduction-of-function allele of  
73 *rars-1*, which encodes a cytoplasmic arginyl-tRNA synthetase, was isolated and identified based  
74 on its strong hypoxia resistant phenotype (Anderson et al., 2009). *rars-1 (gc47)* animals have an  
75 approximately 50% reduction in global translation rate consistent with the essential role of  
76 aminoacyl-tRNA synthetases like RARS-1 in protein translation. The discovery that RARS-1 along  
77 with other aminoacyl-tRNA synthetases (Anderson et al., 2009) and a few implicated translation  
78 factors (Mabon et al., 2009) strongly control hypoxic survival motivated a more systematic

79 study of the effect of translation factor knockdown on hypoxic injury. In order to establish  
80 mammalian relevance and therapeutic potential, we first tested the ability of translation factor  
81 knockdown to protect cultured mouse hippocampal neurons. We then tested the effect on  
82 hypoxic survival of a diverse set of *C. elegans* translation factors to determine if hypoxia  
83 resistance was a general feature of translational suppression, regardless of which factor was  
84 inhibited. We then asked if hypoxia resistance by translation factor knockdown was necessarily  
85 associated with reduced oxygen consumption or if other known effects of translational  
86 suppression might be more tightly associated with hypoxic survival. Our hypothesis was that  
87 hypoxia protection produced by translation factor knockdown is not solely due to a reduced  
88 rate of oxygen consumption.

89

90

## 91 MATERIALS AND METHODS

### 92 Lentiviral shRNA, Hippocampal Neuron culture and hypoxia

93 Coding sequences of translation factors/modulators were cloned into the FCIV shuttle lentiviral  
94 vector (ubiquitin promoter–shRNA-IRES-enhanced YFP (Venus)) (Araki et al., 2004). Each clone  
95 was confirmed by nucleotide sequencing. Viral packaging took place in HEK293T cells by using  
96 Fugene reagent to transfect cells with a cocktail of plasmids: shRNA construct,  $\Delta 8.9$ , and pVSV-  
97 g. Transfection efficiency was confirmed by monitoring expression of co-transcribed YFP 48  
98 hours post transfection. Once transfection was confirmed, HEK293T medium was collected.  
99 After a brief centrifugation, 20 $\mu$ l of each lentivirus-containing media ( $\sim 10^3$  particles  $\mu$ l<sup>-1</sup>) was  
100 directly added into neuronal cultures. Primary P0 mouse hippocampal neurons were cultured  
101 for 5 days on poly-d-lysine-coated 4-well dishes in Neurobasal medium supplemented with B27,  
102 L-glutamine, and 5-fluoro-2'-deoxyuridine (FUDR) to prevent growth of glia. After 5 days, the  
103 neurons were infected with lentivirus carrying each shRNA or control luciferase shRNA. Seven  
104 days post infection, cultures were examined for co-transcribed YFP expression to confirm  
105 successful transduction. Cultures were then exposed to 7 hours of hypoxia (< 0.3% O<sub>2</sub>) at 37°C.  
106 Cells were allowed to recover for 20h in normoxia at 37°C and scored for death by an ethidium  
107 homodimer assay (Invitrogen, Grand Island, NY). Cultures were then fixed and stained with Tuj1  
108 antibody (Santa Cruz Biotechnology, Santa Cruz, CA) to count total neurons. Survival data (100\*  
109 alive neurons/total neurons) from three wells ( $\geq 10$  high power fields) were pooled as one trial.

110

### 111 *C. elegans* strains and culture conditions

112 The wild type strain for all experiments was N2 (var. Bristol) (Brenner, 1974). Strains were  
113 maintained at 20° on NGM agar seeded with OP50 bacteria (Stiernagle, 2006). *rars-1(gc47)* was  
114 generated in our laboratory (Anderson et al., 2009) and was outcrossed prior to testing; the  
115 genotype were confirmed by PCR.

### 116 RNAi

117 The gene target of all RNAis was confirmed by sequencing. One-generation feeding RNAi was  
118 performed as described previously (Timmons, 2006b; Mabon et al., 2009). Briefly, two gravid  
119 adult worms were left on agar RNAi plates with 2 day old RNAi bacterial lawns for 3 hours to

120 obtain 30-50 eggs per plate. RNAi plates were composed of NGM agar supplemented with 50  
121  $\mu\text{g ml}^{-1}$  carbenicillin and 1 mM IPTG and seeded with the appropriate RNAi bacterial strain  
122 cultured in 2xYT with 50  $\mu\text{g ml}^{-1}$  carbenicillin, 10  $\mu\text{g ml}^{-1}$  tetracycline and 0.8 mM IPTG. Unless  
123 otherwise specified, animals were grown on RNAi plates from embryos to young adulthood,  
124 one day past the L4 stage and then phenotyped. Feeding with bacteria transformed with the  
125 L4440 empty vector was used as a negative control for all RNAi experiments (Timmons, 2006a).

### 126 **Hypoxic killing assays**

127 Hypoxic killing assays were performed as described previously (Scott et al., 2002) except at 26°  
128 and without buffer change . Briefly, synchronized one day post L4 well-fed adults were  
129 transferred from agar plates to 1.5 ml polypropylene tubes with 1 ml of M9 buffer (Stiernagle,  
130 2006). After the worms pelleted by gravity, buffer was removed to 100  $\mu\text{l}$  and the tubes placed  
131 in the hypoxic chamber ( $[\text{O}_2] < 0.3\%$ ,  $T \approx 26^\circ$ ) for 20 hours except for delayed death assays (10  
132 hour hypoxic incubation). In preliminary experiments, dissolved oxygen concentration in the  
133 M9 buffer with worms was found to be initially  $15.6 \pm 0.05 \text{ vol}\%$  (mean  $\pm$  sem of 5 replicates)  
134 outside of the hypoxic chamber and dropped exponentially to  $0.06 \pm 0.04 \text{ vol}\%$  within 1 hour in  
135 the hypoxic chamber and to below the level of detection by 1.5 hours. After the hypoxic  
136 incubation, the worms were transferred back to NGM agar plates and recovered in air at 20° for  
137 24 hours prior to scoring as alive (any spontaneous or evoked behavior) or dead. One trial  
138 consisted of triplicate tubes with  $\approx 50$  worms/tube. For delayed death, worms were scored for  
139 death every 24 hours after placing on recovery plates up to 96 hours of recovery.

### 140 **FRAP assays**

141 FRAP assays were adapted from Tavernarakis (Syntichaki et al., 2007; Kourtis and Tavernarakis,  
142 2009). *js115;oxls34[Punc-64::open Stx Pmyo-2::GFP]*, which expresses pharyngeal GFP  
143 (Richmond et al., 2001), was synchronized on RNAi plates and grown at 20° to the adult stage.  
144 Worms were mounted and immobilized on a 5% agarose pad in a drop of 0.10  $\mu\text{m}$   
145 microspheres (Polysciences, Inc catalog # 00876) and imaged/photobleached with a 40X  
146 objective. Prior to photobleaching, an image of each worm was taken at an exposure time just  
147 below saturation and these camera settings were used for that particular worm for the  
148 remainder of the experiment. The worm was then photobleached for 10 to 13 minutes to

149 reduce the initial emission intensity to 20 to 30% of the pre-bleach value. All worms on a given  
150 day were photobleached for the same number of minutes. An immediate post bleach image  
151 was taken, and the worm was then returned to the particular RNAi plate for 24 hours at 20°.   
152 After the 24 hour recovery period, dead worms or worms showing signs of damage were  
153 censored, and healthy worms were remounted and imaged with exposure times identical to the  
154 pre-bleach image. Image J was used to quantify the GFP emission intensities that were then  
155 normalized to the pre-bleach image defined as 100%. Relative recovery for each worm was  
156 calculated according to  $(\text{recovery} - \text{bleach}) / (\text{prebleach} - \text{bleach})$ . A minimum of six worms per  
157 RNAi were tested.

158 For FRAP with cycloheximide, one day post L4 adults were picked to plates containing  
159 various concentrations of cycloheximide and allowed to incubate for 2 hours. Plates were  
160 prepared by spreading the appropriate concentration of cycloheximide (from a stock solution of  
161  $50 \text{ mg ml}^{-1}$  in 70% ethanol) onto NGM and then seeding with L4440 that was concentrated 10-  
162 fold and resuspended in M9 containing the appropriate cycloheximide dilution. The FRAP  
163 assays were then performed as above except that the worms were recovered on plates with  
164 the respective concentration of cycloheximide. Comparison of the FRAP values with the  
165 addition of water versus 70% ethanol at the volume needed for the highest [cycloheximide]  
166 showed no effect of this concentration of ethanol on FRAP.

### 167 **Oxygen consumption assays**

168 Synchronized one day post L4 adult worms grown on L4440 or RNAi-expressing bacteria  
169 were washed three times with M9 buffer to remove bacteria. Approximately 3000 worms were  
170 transferred in M9 buffer to three respirometer cells (1000 worms/cell in 1 ml M9) (Strathkelvin  
171 Model 929, Glasgow, UK); oxygen consumption values were found to be linear over a range of  
172 worm numbers from 1000 to 7500. Oxygen consumption was measured for 20-30 minutes with  
173 continuous stirring at 20°. The oxygen consumption rate was calculated from the slope of the  
174 linear portion of the plot, which was between 250 -30  $\mu\text{mole l}^{-1}$  dissolved oxygen. The worms  
175 were then removed, resuspended in 500ul of 1% SDS, sonicated, and debris removed by  
176 centrifugation for 10 minutes at 17,000g. Protein concentration was determined in duplicate  
177 by direct spectrophotometry at 280 nm (ND-1000, Nanodrop Technologies, USA) with bovine

178 serum albumin used as a standard. Oxygen consumption values were normalized to protein  
179 concentration, which was found to be linear with the number of worms over a range from at  
180 least 1000 – 7500 worms. Bacteria was found not to contribute to oxygen consumption by  
181 three control experiments: 1) Oxygen consumption of heat killed worms ( $0.22 \pm 0.05$  nmoles  
182  $\text{min}^{-1}$  –  $\text{O}_2$  consumption not normalized to biomass) was not significantly different than buffer  
183 control ( $0.12 \pm 0.22$  nmoles  $\text{min}^{-1}$ , mean  $\pm$  SD,  $p = 0.42$ , unpaired t-test ); 2) the oxygen  
184 consumptions of worms fed live OP50 bacteria, no OP50 bacteria for 3 hours, or heat-killed  
185 OP50 bacteria were similar (10.14, 10.34, and 9.2 nmoles  $\text{min}^{-1} \text{mg}^{-1}$ , respectively); 3) Oxygen  
186 consumption of worms treated with 100 mM sodium azide for two hours was not significantly  
187 different than buffer control ( $0.18 \pm 0.09$  vs  $0.12 \pm 0.22$  nmoles  $\text{min}^{-1}$  not normalized to  
188 biomass, mean  $\pm$  SD of ,  $p = 0.63$ , unpaired t-test)

189 For oxygen consumption assays with cycloheximide, worms were transferred with M9  
190 into 15 ml conical polypropylene tubes, rinsed once, the supernatant removed, then incubated  
191 in 500  $\mu\text{l}$  of various concentrations of cycloheximide for 2 hours. The worms were then rinsed  
192 twice with 8 ml of M9, and the solution changed back to 1 ml at the original cycloheximide  
193 concentration and transferred to the respirometer for oxygen consumption measurement  
194 followed by protein quantification as described above.

### 195 **Lifespan and paraquat assays**

196 Lifespan was defined as the time from laid embryo to death. Worms that died of  
197 “unnatural causes” such as crawling up the side of the petri dish or bagging (internal hatching  
198 of larvae) were censored. Median lifespans were calculated from Kaplan-Meier survival curves  
199 of 50 worms/condition and curves were compared for statistical difference in median lifespan  
200 using Mantel-Cox log rank test (Graphpad Prism 5.0). Paraquat assays were performed and  
201 analyzed identically to lifespan except 50 worms/condition were transferred to plates  
202 containing 4 mM paraquat on day 7 after egg lay.

### 203 **Tunicamycin assays**

204 The tunicamycin growth arrest assay has been published previously (Anderson et al., 2009).  
205 Briefly, eggs were laid on the various RNAi plates containing  $1\mu\text{g mL}^{-1}$  tunicamycin; 14 – 81



206 eggs/trial were scored. The fraction of worms reaching the adult stage was scored four days  
207 later. Growth was at 20°.  
208

209 **RESULTS**

210 **Knockdown of translation factors in mouse neurons can protect from hypoxic death.** In our  
211 previous screens, we have found that reduction-of-function of multiple aminoacyl tRNA  
212 synthetases and a few translation initiation factors strongly protected *C. elegans* from hypoxia.  
213 To assess the relevance of our findings in *C. elegans* to hypoxic injury of mammalian neurons,  
214 we tested whether knockdown of the mouse homolog of five of the implicated translation  
215 factors protect cultured mouse hippocampal neurons. Knockdown of four out of five translation  
216 factors provided significant protection of the hippocampal neurons from hypoxic death (Figure  
217 1A). Unlike in *C. elegans*, shRNA knockdown of Rars (arginyl-tRNA synthetase) was uniformly  
218 neurotoxic, and the effect on hypoxic sensitivity was not tested. Some Nars (asparaginyl-tRNA  
219 synthetase) and Yars (tyrosyl-tRNA synthetase) shRNA constructs at higher viral titers were also  
220 toxic, but at lower titers were protective without gross toxicity. Knockdown of Ei2b2 (eukaryotic  
221 translation initiation factor 2B, subunit 2 beta) and Gars (glycyl-tRNA synthetase) were each  
222 significantly protective without evidence of toxicity. For all of the protective constructs, the  
223 level of knockdown was greater than four-fold (Figure 1B).

224

225 **Knockdown of multiple translation factors in *C. elegans* protects from organismal hypoxic**  
226 **death.** In order to examine systematically the efficacy of translation factor knock down against  
227 hypoxic injury, we returned to the *C. elegans* model. We knocked down translation factors that  
228 mediate all three major steps in translation: initiation, elongation, and termination (Figure 2A).  
229 Knockdown of all ten translation factors produced significant hypoxia resistance although the  
230 level of resistance varied considerably (Figure 2B).

231

232 **Variations in hypoxia protection not fully accounted for by the degree of translational**  
233 **suppression.** We assumed that the level of hypoxia resistance provided by each RNAi was  
234 proportional to the degree of translational suppression. To test this assumption, we compared  
235 protein translation rates in *C. elegans* pharyngeal myocytes after treatment with the various  
236 RNAis using fluorescence recovery after photobleaching (FRAP) (Syntichaki et al., 2007; Kourtis  
237 and Tavernarakis, 2009). The FRAP assay uses animals expressing green fluorescent protein

238 (GFP); recovery of fluorescence after photobleaching is a measure of new protein production.  
239 We first validated the FRAP method by showing that it fell dose-dependently with the  
240 translational inhibitor cycloheximide (Figure 3A). Also FRAP estimates of translation rates for  
241 *rars-1* RNAi agreed well with previous estimates derived from <sup>35</sup>S methionine incorporation (  
242 54% of control by FRAP vs 52% by <sup>35</sup>S) (Anderson et al., 2009). However, the translational rates  
243 as measured by FRAP did not fully explain the hypoxia resistance of the translation factor  
244 RNAis. For example, *iftb-1* and *rps-15* RNAi reduced FRAP least of all of the RNAis but both  
245 produced strong hypoxia survival (88.5% and 67% respectively). On the other hand, knockdown  
246 of the translation factor gene *erfa-3* produced the strongest reduction in FRAP, but one of the  
247 weakest hypoxic survival phenotypes. Expressing the data as the product of the hypoxic survival  
248 and FRAP within the same cohorts (aliquots of worms from the same RNAi growth plates)  
249 shows that the variation in hypoxic survival produced by translation factor knockdown is not  
250 fully explained by the degree of translational suppression (Figure 3C). Correlation of FRAP with  
251 hypoxic survival did not reach significance (Figure 3D).

252

### 253 **Variations in hypoxia protection not fully accounted for by oxygen consumption. A**

254 longstanding and widely stated explanation for the hypoxia resistance of cells or organisms with  
255 reduced translation is an energetic one, that is, reduced oxygen consumption allows cells to  
256 withstand hypoxia until oxygen is restored (Hochachka et al., 1996; Liu and Simon, 2004;  
257 Fahling, 2009; Wheaton and Chandel, 2011). To test the hypothesis, we measured oxygen  
258 consumption and hypoxia resistance in cohorts of worms with translation factor knockdown. As  
259 for FRAP, we verified that oxygen consumption varied reliably with cycloheximide-mediated  
260 translational suppression (Figure 4A). The correlation of FRAP with oxygen consumption for  
261 various cycloheximide concentrations was strong ( $r=0.85$  – data not shown). We then measured  
262 oxygen consumption for all ten translation factor RNAis (Figure 4B). Most RNAis did produce  
263 significant reductions in oxygen consumption; some RNAis such as those targeting *eef-2*, *ifg-1*,  
264 and *rpl-6* strongly reduced oxygen consumption to levels similar to the maximum reduction  
265 seen with cycloheximide. However, *rars-1* and *ife-2* RNAis produced no significant reduction in  
266 O<sub>2</sub> consumption. The product of hypoxic survival and oxygen consumption for cohorts (aliquots

267 of worms from the same RNAi growth plates) shows that *rars-1* and *eef-2* are outliers compared  
268 to the rest of the RNAis (Figure 4C). *rars-1(gc47)*, a reduction-of-function allele shown  
269 previously to have a translation rate similar to that of *rars-1*(RNAi), had only a 26% reduction in  
270 O<sub>2</sub> consumption (Figure 4B) and had a hypoxic survival x oxygen consumption product similar to  
271 *rars-1*(RNAi) (Figure 4C). Overall as for FRAP, the correlation of hypoxic survival with reduced  
272 oxygen consumption did not reach statistical significance (Figure 4D). However with the  
273 exclusion of *rars-1* and *eef-2*, the hypoxic survival to O<sub>2</sub> correlation for the rest of the RNAis was  
274 highly significant ( $r=-0.93$ ,  $p = 0.003$ ).

275 We have previously shown that *rars-1*(RNAi) applied only after hypoxia protects from  
276 hypoxia (Anderson et al., 2009). We reproduced that result here (Figure 5A,C). This result is  
277 inconsistent with a mechanism of hypoxia protection where reduced oxygen consumption  
278 during the hypoxic exposure is entirely responsible for the protection. Given that the hypoxia  
279 resistance of other translation factors correlated well with oxygen consumption, we considered  
280 the possibility that knockdown of these factors might not be protective after hypoxia. We  
281 tested this hypothesis for *iftb-1*(RNAi), which produces a level of hypoxia resistance similar to  
282 *rars-1*(RNAi) but with a much stronger reduction in oxygen consumption. Unlike *rars-1*(RNAi),  
283 *iftb-1*(RNAi) provided no survival benefit when applied only during recovery after hypoxia  
284 (Figure 5B,C). The lack of efficacy of *iftb-1* RNAi after hypoxia could be due to slower kinetics of  
285 functional knockdown so that the level of IFTB-1 protein is not reduced quickly enough to  
286 improve recovery. We tested this hypothesis by exposure to either *iftb-1* or *rars-1* RNAi for only  
287 one day just prior to hypoxic incubation then recovery on non-RNAi for the usual 24 hours.  
288 With this brief RNAi exposure, both *iftb-1*(RNAi) and *rars-1*(RNAi) provided a similar level of  
289 modest but significant hypoxia resistance compared to the empty vector control (Fig. 5D). Thus,  
290 the kinetics of functional knockdown by *iftb-1* (RNAi) appears similar to that of *rars-1*(RNAi). We  
291 conclude that the mechanisms of protection produced by knockdown of RARS-1 and IFTB-1  
292 fundamentally differ.

293

294 **Hypoxia resistance and lifespan do not correlate.** Knockdown or mutation of a number of  
295 translation factors has been found to increase longevity of *C. elegans* (Curran and Ruvkun,

296 2007; Hansen et al., 2007; Hipkiss, 2007; Pan et al., 2007; Syntichaki et al., 2007; Rogers et al.,  
297 2011). We have shown that long-lived *C. elegans* mutants of the insulin/IGF receptor homolog  
298 *daf-2* are highly hypoxia resistant (Scott et al., 2002) and that *rars-1(gc47)* has a significantly  
299 prolonged lifespan (Anderson et al., 2009). Thus, we hypothesized that lifespan and hypoxia  
300 resistance would covary with translation factor knockdown. As previously shown for the *rars-*  
301 *1(gc47)* mutation (Anderson et al., 2009), *rars-1*(RNAi) did result in a significant increase in  
302 lifespan (Figure 6F,I). Likewise, *ifg-1* and *rps-15* RNAi animals were long lived (Figure 6C,H,I).  
303 However, the five other RNAis did not significantly increase lifespan (Figure 6A,B,D,E,G,I). The  
304 overall correlation of the lifespan and hypoxic survival phenotypes was not significant (Figure  
305 6J). Lifespan also failed to correlate with FRAP or oxygen consumption (Figure 6K,L).

306

307 **Resistance to hypoxia and paraquat do not correlate.** Reactive oxygen species are generated  
308 upon reoxygenation after hypoxia and can promote cell death (Allen and Bayraktutan, 2009;  
309 Niizuma et al., 2009; Raedschelders et al., 2012). Resistance to reactive oxygen species in *C.*  
310 *elegans* has been associated with translational suppression (Syntichaki et al., 2007; Wang et al.,  
311 2010). Thus, we hypothesized that the hypoxia protective effect of translation factor  
312 knockdown was secondary to resistance to oxidative damage. To test this hypothesis, we  
313 measured the survival of RNAi-treated worms on agar plates containing the reactive oxygen  
314 species generator paraquat. Six of the eight translation factor RNAis tested produced a  
315 significant increase in survival on paraquat; *erfa-3* and *iftb-1* RNAis did not (Figure 7A). The  
316 correlation of the paraquat and hypoxic survival phenotypes was not significant (Figure 7B).  
317 However, the correlation of paraquat survival with lifespan was highly significant (Figure 7C).

318

319 **Resistance to hypoxia and protein misfolding stress strongly correlate.** Hypoxia produces a  
320 significant stress on intracellular protein folding homeostasis and ultimately results in an  
321 increase in misfolded proteins (Koumenis and Wouters, 2006; Ge et al., 2007; Rzymiski and  
322 Harris, 2007; Mao and Crowder, 2010). Misfolded proteins can directly or indirectly promote  
323 cell death (Dobson, 2003; Powers et al., 2009). By measuring sensitivity to tunicamycin, which  
324 increases the level of misfolded proteins (Merksamer et al., 2008), we tested whether

325 translation factor knockdown generally produces tunicamycin resistance and whether this  
326 resistance covaries with hypoxia resistance. All but one translation factor RNAi conferred  
327 significant resistance to tunicamycin (Figure 8A). As shown previously (Anderson et al., 2009),  
328 *rars-1(gc47)* was strongly tunicamycin resistant. The correlation of resistance to tunicamycin  
329 with that to hypoxia was highly significant (Figure 8B).

330

331 **DISCUSSION**

332 The data presented herein supports four novel conclusions. First, in both mouse and  
333 worm, knockdown of multiple translation factors can improve hypoxic survival. Second and  
334 quite surprisingly, the hypoxia protection produced by knockdown of translation factors in *C.*  
335 *elegans* is not explained entirely by the degree of reduction of translation rate. Third, reduction  
336 in oxygen consumption during hypoxic exposure may be the primary mechanism of protection  
337 for knockdown of some translation factors but is not necessary for the improved survival  
338 produced by reduction of function of *rars-1* and perhaps of others. Finally among the factors  
339 tested, the survival advantage conferred by translation factor knockdown is most highly  
340 correlated with resistance to the protein misfolding agent tunicamycin. We will discuss below  
341 the implications and potential limitations of these conclusions.

342 Knockdown of translation factors mediating all three steps of translation, initiation,  
343 elongation, and termination, as well as a knockdown of two ribosomal subunits were protective  
344 against hypoxic death in *C. elegans*. After accounting for the effect on translation rate (Figure  
345 4C), there was clearly a large range of efficiencies for hypoxic protection with knockdown of the  
346 translation termination factor ERFA-3 having decidedly the weakest protective effect for the  
347 level of translational suppression and IFTB-1 knockdown the strongest. IFTB-1 encodes eIF2 $\beta$ ,  
348 which is one of three subunits of the eIF2 initiation factors. Given the strong correlation of  
349 resistances to misfolded protein stress and hypoxia, it is interesting to speculate that the highly  
350 effective hypoxic protection derived from *iftb-1* knockdown is related to a reduction in the  
351 levels of the eIF2:GTP:met-tRNA<sup>i</sup> ternary initiation complex. Reduction in this ternary complex,  
352 not only reduces global translation rate, but can also increase initiation from non-AUG codons  
353 (Marintchev and Wagner, 2004) in a manner similar to and perhaps synergistic with that  
354 produced by activation of PERK, a component of the endoplasmic reticulum unfolded protein  
355 response (UPR<sup>ER</sup>). Upon activation by unfolded protein stress such as that produced by hypoxia,  
356 PERK phosphorylates eIF2 $\alpha$  and reduces global translation rate while paradoxically increasing  
357 the translation of certain transcripts that help to ameliorate misfolded protein stress (Vattem  
358 and Wek, 2004; Zhou et al., 2008). In mammalian cells, PERK minus cells are significantly  
359 hypersensitive to hypoxia, and mutation of the PERK-phosphorylated serine on eIF2 $\alpha$  also

360 increases hypoxic sensitivity (Bi et al., 2005). In *C. elegans*, hypoxia does induce PERK-  
361 dependent phosphorylation of eIF2 $\alpha$ , but a PERK-1 loss-of-function mutant does not appear to  
362 be hypersensitive to hypoxia, at least in a wild type background (Mao and Crowder, 2010). On  
363 the other hand, a reasonable hypothesis for the weakly protective effect of the translation  
364 termination factor ERFA-3 derives from the fact that eRF3 depletion should produce an increase  
365 in nascent polypeptides still attached to ribosomes as well as novel polypeptides produced by  
366 read through of stop codons (Chauvin et al., 2005; Dever and Green, 2012). This relative  
367 increase in nascent polypeptides relative to mature protein as well as prolonged association  
368 with the translation complex would be expected to increase the level of misfolded proteins  
369 (Guerriero and Brodsky, 2012) and might mitigate the hypoxia protective effects from the  
370 reduction in overall translation rates.

371 Prior to this work, the essentially universal and widely stated assumption was that the  
372 improved survival from translational suppression derived from reduced oxygen consumption  
373 (Hochachka et al., 1996; Liu and Simon, 2004; Fahling, 2009; Wheaton and Chandel, 2011).  
374 While reasonable, this assumption was not experimentally tested. Our data demonstrate that  
375 the oxygen consumption mechanism cannot explain the protection derived from knockdown of  
376 at least one translation factor, *rars-1*, where knockdown does not significantly reduce oxygen  
377 consumption. As we cannot independently manipulate oxygen consumption and translation  
378 factor levels, it is unclear whether the oxygen consumption reductions produced by the  
379 knockdown of the other translation factors are essential to their protective phenotype.  
380 However, the strong correlation of hypoxic survival and oxygen consumption for knockdown of  
381 all but *rars-1* and *eef-2* suggests that the oxygen consumption mechanistic hypothesis could be  
382 correct for many translation factors. What is unique about the *rars-1* mechanism is unclear.  
383 Whatever the mechanism, it is capable of improving survival when applied after hypoxic  
384 survival.

385 A limitation of our results is the lack of anatomical expression or functional data for  
386 most of the *C. elegans* translation machinery genes studied. Thus, one possibility for the lack of  
387 correlation of oxygen consumption or FRAP with hypoxic survival is that the expression and,  
388 more importantly, the function of some of the translation factor genes might not be ubiquitous.



389 For example, if *rars-1* were functionally important in only a specific cell type that strongly  
390 controls organismal hypoxic survival but that did not contribute greatly to organismal oxygen  
391 consumption, then reduction of *rars-1* function could strongly improve hypoxic survival without  
392 significantly altering oxygen consumption. In other words, *rars-1* might function at a cell  
393 autonomous level to control translation rate and oxygen consumption and secondarily hypoxic  
394 survival of that cell but at an organismal level *rars-1*-regulated hypoxic sensitivity might be cell  
395 non-autonomous. Without detailed cell specific functional data for all three traits (hypoxic  
396 sensitivity, oxygen consumption, translation rate) for *rars-1* and the other translation factor  
397 genes, we cannot rule out cell specific functions for some of these genes as an explanation for  
398 the lack of correlation of these traits at an organismal level.

399 The only effect of translation factor knockdown that was well correlated with the  
400 improved hypoxic survival for all genes was resistance to the protein misfolding agent  
401 tunicamycin. We previously observed that *rars-1(gc47)* was tunicamycin resistant and that  
402 mutations in components of the endoplasmic reticulum unfolded protein response (UPR<sup>ER</sup>)  
403 weakly suppressed the hypoxia resistance of *rars-1*(RNAi) (Anderson et al., 2009). We have also  
404 shown brief non-lethal hypoxic exposure induces a hypoxia protective response that requires  
405 an intact UPR<sup>ER</sup> (Mao and Crowder, 2010). Based on these results, we previously hypothesized  
406 that reducing the function of *rars-1* and, by inference, of all other translation factors improves  
407 hypoxic survival by reducing the load of nascent polypeptides that would contribute to the  
408 misfolded protein load during the peri-hypoxic period (Anderson et al., 2009). However, our  
409 current results indicate that translational suppression does not solely determine the level of  
410 hypoxic protection.

411 An alternative hypothesis is that depletion of specific translation factors reduces  
412 translation machinery aggregation produced by hypoxia. Components of the translation  
413 machinery have been found to be aggregated after hypoxia and this aggregation may promote  
414 or reduce cell death depending on the experimental model (Jamison et al., 2008; Buchan and  
415 Parker, 2009) . Further, depletion of specific translation factors has differential effects on  
416 translation machinery aggregation (Mokas et al., 2009). One reasonable hypothesis is that  
417 reduction of some translation factors such as RARS-1 strongly alter the level of translation

418 machinery aggregation produced by hypoxia in a way that improves recovery after hypoxia and  
419 increases resistance to protein misfolding agents. This hypothesis remains to be tested.

420

421

422

423

424 **ACKNOWLEDGEMENTS**

425 We thank Kelli Simburger for construction of the lentiviral vectors.

426

427 **FUNDING**

428 This work was supported by grants from the National Institute of Neurological Disorders and  
429 Stroke [NS055905 to CMC, NS045905 to CMC, NS065053 to JM, NS078007 to JM]; from the  
430 National Institute on Aging [AG0113730 to JM], and from the International Anesthesia Research  
431 Society [Frontiers in Anesthesia Research Award to CMC].

432

## 433 REFERENCES

434

435 **Allen, C. L. and Bayraktutan, U.** (2009). Oxidative stress and its role in the pathogenesis of  
436 ischaemic stroke. *Int J Stroke* **4**, 461-470.

437 **Anderson, L. L., Mao, X., Scott, B. A. and Crowder, C. M.** (2009). Survival from hypoxia in *C.*  
438 *elegans* by inactivation of aminoacyl-tRNA synthetases. *Science* **323**, 630-633.

439 **Araki, T., Sasaki, Y. and Milbrandt, J.** (2004). Increased nuclear NAD biosynthesis and SIRT1  
440 activation prevent axonal degeneration. *Science* **305**, 1010-1013.

441 **Arimoto, K., Fukuda, H., Imajoh-Ohmi, S., Saito, H. and Takekawa, M.** (2008). Formation of  
442 stress granules inhibits apoptosis by suppressing stress-responsive MAPK pathways. *Nat Cell*  
443 *Biol* **10**, 1324-1332.

444 **Bi, M., Naczki, C., Koritzinsky, M., Fels, D., Blais, J., Hu, N., Harding, H., Novoa, I., Varia, M.,**  
445 **Raleigh, J. et al.** (2005). ER stress-regulated translation increases tolerance to extreme hypoxia  
446 and promotes tumor growth. *Embo J* **24**, 3470-3481.

447 **Brahimi-Horn, M. C., Chiche, J. and Pouyssegur, J.** (2007). Hypoxia and cancer. *J Mol Med* **85**,  
448 1301-1307.

449 **Brenner, S.** (1974). The genetics of *Caenorhabditis elegans*. *Genetics* **77**, 71-94.

450 **Buchan, J. R. and Parker, R.** (2009). Eukaryotic stress granules: the ins and outs of translation.  
451 *Mol Cell* **36**, 932-941.

452 **Chauvin, C., Salhi, S., Le Goff, C., Viranaicken, W., Diop, D. and Jean-Jean, O.** (2005).  
453 Involvement of human release factors eRF3a and eRF3b in translation termination and  
454 regulation of the termination complex formation. *Mol Cell Biol* **25**, 5801-5811.

455 **Curran, S. P. and Ruvkun, G.** (2007). Lifespan regulation by evolutionarily conserved genes  
456 essential for viability. *PLoS Genet* **3**, e56.

457 **Dever, T. E. and Green, R.** (2012). The elongation, termination, and recycling phases of  
458 translation in eukaryotes. *Cold Spring Harb Perspect Biol* **4**.

459 **Dobson, C. M.** (2003). Protein Folding and Disease: a view from the first Horizon Symposium.  
460 *Nat Rev Drug Discov* **2**, 154-160.

461 **Fahling, M.** (2009). Surviving hypoxia by modulation of mRNA translation rate. *J Cell Mol Med*  
462 **13**, 2770-2779.

463 **Ge, P., Luo, Y., Liu, C. L. and Hu, B.** (2007). Protein aggregation and proteasome dysfunction  
464 after brain ischemia. *Stroke* **38**, 3230-3236.

465 **Guerriero, C. J. and Brodsky, J. L.** (2012). The delicate balance between secreted protein folding  
466 and endoplasmic reticulum-associated degradation in human physiology. *Physiol Rev* **92**, 537-  
467 576.

468 **Hansen, M., Taubert, S., Crawford, D., Libina, N., Lee, S. J. and Kenyon, C.** (2007). Lifespan  
469 extension by conditions that inhibit translation in *Caenorhabditis elegans*. *Aging Cell* **6**, 95-110.

470 **Hipkiss, A. R.** (2007). On why decreasing protein synthesis can increase lifespan. *Mech Ageing*  
471 *Dev* **128**, 412-414.

472 **Hochachka, P. W., Buck, L. T., Doll, C. J. and Land, S. C.** (1996). Unifying theory of hypoxia  
473 tolerance: molecular/metabolic defense and rescue mechanisms for surviving oxygen lack. *Proc*  
474 *Natl Acad Sci U S A* **93**, 9493-9498.

- 475 **Jamison, J. T., Kayali, F., Rudolph, J., Marshall, M., Kimball, S. R. and DeGracia, D. J.** (2008).  
476 Persistent redistribution of poly-adenylated mRNAs correlates with translation arrest and cell  
477 death following global brain ischemia and reperfusion. *Neuroscience* **154**, 504-520.
- 478 **Kim, Y., Lin, Q., Glazer, P. M. and Yun, Z.** (2009). Hypoxic Tumor Microenvironment and Cancer  
479 Cell Differentiation. *Current Molecular Medicine* **9**, 425-434.
- 480 **Koumenis, C. and Wouters, B. G.** (2006). "Translating" tumor hypoxia: unfolded protein  
481 response (UPR)-dependent and UPR-independent pathways. *Mol Cancer Res* **4**, 423-436.
- 482 **Kourtis, N. and Tavernarakis, N.** (2009). Cell-specific monitoring of protein synthesis in vivo.  
483 *PLoS ONE* **4**, e4547.
- 484 **Liu, L. and Simon, M. C.** (2004). Regulation of transcription and translation by hypoxia. *Cancer*  
485 *Biol Ther* **3**, 492-497.
- 486 **Mabon, M. E., Mao, X., Jiao, Y., Scott, B. A. and Crowder, C. M.** (2009). Systematic  
487 identification of gene activities promoting hypoxic death. *Genetics* **181**, 483-496.
- 488 **Mao, X. R. and Crowder, C. M.** (2010). Protein misfolding induces hypoxic preconditioning via a  
489 subset of the unfolded protein response machinery. *Mol Cell Biol* **30**, 5033-5042.
- 490 **Marintchev, A. and Wagner, G.** (2004). Translation initiation: structures, mechanisms and  
491 evolution. *Q Rev Biophys* **37**, 197-284.
- 492 **Merksamer, P. I., Trusina, A. and Papa, F. R.** (2008). Real-time redox measurements during  
493 endoplasmic reticulum stress reveal interlinked protein folding functions. *Cell* **135**, 933-947.
- 494 **Mokas, S., Mills, J. R., Garreau, C., Fournier, M. J., Robert, F., Arya, P., Kaufman, R. J.,  
495 Pelletier, J. and Mazroui, R.** (2009). Uncoupling stress granule assembly and translation  
496 initiation inhibition. *Mol Biol Cell* **20**, 2673-2683.
- 497 **Niizuma, K., Endo, H. and Chan, P. H.** (2009). Oxidative stress and mitochondrial dysfunction as  
498 determinants of ischemic neuronal death and survival. *J Neurochem* **109 Suppl 1**, 133-138.
- 499 **Pan, K. Z., Palter, J. E., Rogers, A. N., Olsen, A., Chen, D., Lithgow, G. J. and Kapahi, P.** (2007).  
500 Inhibition of mRNA translation extends lifespan in *Caenorhabditis elegans*. *Aging Cell* **6**, 111-  
501 119.
- 502 **Powers, E. T., Morimoto, R. I., Dillin, A., Kelly, J. W. and Balch, W. E.** (2009). Biological and  
503 Chemical Approaches to Diseases of Proteostasis Deficiency. *Annual Review of Biochemistry* **78**,  
504 959-991.
- 505 **Raedschelders, K., Ansley, D. M. and Chen, D. D.** (2012). The cellular and molecular origin of  
506 reactive oxygen species generation during myocardial ischemia and reperfusion. *Pharmacol*  
507 *Ther* **133**, 230-255.
- 508 **Richmond, J. E., Weimer, R. M. and Jorgensen, E. M.** (2001). An open form of syntaxin  
509 bypasses the requirement for UNC-13 in vesicle priming. *Nature* **412**, 338-341.
- 510 **Rockwell, S., Dobrucki, I. T., Kim, E. Y., Marrison, S. T. and Vu, V. T.** (2009). Hypoxia and  
511 radiation therapy: past history, ongoing research, and future promise. *Curr Mol Med* **9**, 442-  
512 458.
- 513 **Rogers, A. N., Chen, D., McColl, G., Czerwieniec, G., Felkey, K., Gibson, B. W., Hubbard, A.,  
514 Melov, S., Lithgow, G. J. and Kapahi, P.** (2011). Life Span Extension via eIF4G Inhibition Is  
515 Mediated by Posttranscriptional Remodeling of Stress Response Gene Expression in *C. elegans*.  
516 *Cell Metab* **14**, 55-66.
- 517 **Rolfe, D. F. and Brown, G. C.** (1997). Cellular energy utilization and molecular origin of standard  
518 metabolic rate in mammals. *Physiol Rev* **77**, 731-758.

- 519 **Rzymiski, T. and Harris, A. L.** (2007). The unfolded protein response and integrated stress  
520 response to anoxia. *Clin Cancer Res* **13**, 2537-2540.
- 521 **Scott, B. A., Avidan, M. S. and Crowder, C. M.** (2002). Regulation of hypoxic death in *C. elegans*  
522 by the insulin/IGF receptor homolog DAF-2. *Science* **296**, 2388-2391.
- 523 **Spriggs, K. A., Bushell, M. and Willis, A. E.** (2010). Translational Regulation of Gene Expression  
524 during Conditions of Cell Stress. *Molecular Cell* **40**, 228-237.
- 525 **Stiernagle, T.** (2006). Maintenance of *C. elegans*. In *Wormbook*, (ed. D. Fay); Wormbook.org.
- 526 **Storey, K. B. and Storey, J. M.** (2010). Metabolic rate depression: the biochemistry of  
527 mammalian hibernation. *Adv Clin Chem* **52**, 77-108.
- 528 **Syntichaki, P., Troulinaki, K. and Tavernarakis, N.** (2007). eIF4E function in somatic cells  
529 modulates ageing in *Caenorhabditis elegans*. *Nature* **445**, 922-926.
- 530 **Timmons, L.** (2006a). Construction of plasmids for RNA interference and in vitro transcription of  
531 double-stranded RNA. *Methods Mol Biol* **351**, 109-117.
- 532 **Timmons, L.** (2006b). Delivery methods for RNA interference in *C. elegans*. *Methods Mol Biol*  
533 **351**, 119-125.
- 534 **van den Beucken, T., Koritzinsky, M. and Wouters, B. G.** (2006). Translational control of gene  
535 expression during hypoxia. *Cancer Biol Ther* **5**, 749-755.
- 536 **Vattem, K. M. and Wek, R. C.** (2004). Reinitiation involving upstream ORFs regulates ATF4  
537 mRNA translation in mammalian cells. *Proc Natl Acad Sci U S A* **101**, 11269-11274.
- 538 **Wang, J., Robida-Stubbs, S., Tullet, J. M., Rual, J. F., Vidal, M. and Blackwell, T. K.** (2010). RNAi  
539 screening implicates a SKN-1-dependent transcriptional response in stress resistance and  
540 longevity deriving from translation inhibition. *PLoS Genet* **6**.
- 541 **Wheaton, W. W. and Chandel, N. S.** (2011). Hypoxia. 2. Hypoxia regulates cellular metabolism.  
542 *Am J Physiol Cell Physiol* **300**, C385-393.
- 543 **Wouters, B. G. and Koritzinsky, M.** (2008). Hypoxia signalling through mTOR and the unfolded  
544 protein response in cancer. *Nat Rev Cancer* **8**, 851-864.
- 545 **Zhou, D., Palam, L. R., Jiang, L., Narasimhan, J., Staschke, K. A. and Wek, R. C.** (2008).  
546 Phosphorylation of eIF2 directs ATF5 translational control in response to diverse stress  
547 conditions. *J Biol Chem* **283**, 7064-7073.

548  
549  
550

551 **Figure Legends**

552 **Figure 1** Survival of mouse hippocampal neurons after hypoxia with translation factor  
553 knockdown. **A.** Survival of mouse hippocampal neuron cultures after hypoxia when infected  
554 with lentiviruses expressing shRNAs targeting translation factors. At least two distinct lentiviral  
555 constructs (designated by an A, B, or C suffix) were effective for three of the four genes without  
556 overt toxicity; only one Nars targeting virus was effective without toxicity. data are a mean  $\pm$   
557 sem of a minimum of three independent trials \* -  $p < 0.01$  versus luciferase virus control, 1-way  
558 ANOVA with Dunnett's multiple comparison correction. **B.** qRT-PCR shows  $> 4$ -fold knockdown  
559 for all four translation factor transcripts. Gene names: Ei2b2 - eukaryotic translation initiation  
560 factor 2B, subunit 2 beta, Gars - glycyl-tRNA synthetase, Nars - asparaginyl-tRNA synthetase,  
561 Yars - tyrosyl-tRNA synthetase

562

563 **Figure 2** Organismal hypoxic survival of *C. elegans* with translation factor knockdown. **A.** *C.*  
564 *elegans* translation machinery genes studied. **B.** *C. elegans* hypoxic survival after RNAi  
565 knockdown of the various translation genes. Wild type *C. elegans* were grown from embryo to  
566 adult on the particular RNAi bacteria, exposed to hypoxia at 26° for 20 hours, recovered for 24  
567 hours, and scored for organismal survival. data are mean  $\pm$  sem of a minimum of 3 independent  
568 trials with at least 70 animals/trial. \* -  $p < 0.01$  versus vector control, 1-way ANOVA with  
569 Dunnett's multiple comparison correction.

570

571 **Figure 3** Correlation of translational suppression with hypoxia resistance for *C. elegans*  
572 translation factor knockdown. **A.** Adult animals were incubated on cycloheximide plates for 2  
573 hours, at which time they were removed for photobleaching then returned to the same  
574 cycloheximide plates for 24 hours before the fractional fluorescent recovery after  
575 photobleaching (FRAP) was measured. **B.** FRAP normalized to L4440 vector control values for  
576 young adult animals exposed to RNAi from embryo to adult. Data are mean  $\pm$  sem of 6-22  
577 animals. \* -  $p < 0.05$  versus vector control, 1-way ANOVA with Dunnett's multiple comparison  
578 correction. **C.** Correlation of FRAP with hypoxic survival for the various RNA conditions is not  
579 significant.

580

581 **Figure 4** Correlation of oxygen consumption with hypoxia resistance for translation factor  
582 knockdown/mutant animals. **A.** One day post L4 adult animals were incubated on  
583 cycloheximide plates for 24 hours, at which time oxygen consumption was measured. Worms  
584 were then lysed and protein concentration measured for normalization. Data are mean  $\pm$  sem  
585 of a minimum of three independent trials; error bars are smaller than the data points in most  
586 cases. **B.** Oxygen consumption for young adult animals exposed to RNAi from embryo to adult.  
587 Data are mean  $\pm$  sem of a minimum of three independent trials. \* -  $p < 0.05$  versus vector  
588 control, 1-way ANOVA with Dunnett's multiple comparison correction. **C.** Correlation of oxygen  
589 consumption with hypoxic survival for the various RNAi conditions is not significant.

590

591 **Figure 5** Effect post-hypoxia RNAi knockdown of *rars-1* and *iftb-1* on survival. **A.** wild type N2  
592 were grown under four RNAi conditions: 1) on L4440 empty vector from egg to adult and  
593 before and after a 10 hour hypoxic exposure (L4440/L4440); 2) on *rars-1*(RNAi) bacteria from  
594 egg to adult and before and after hypoxic exposure (*rars-1/rars-1*); 3) on *rars-1*(RNAi) from egg  
595 to adult and before hypoxia with L4440 after hypoxia during recovery (*rars-1/L4440*); 4) on  
596 L4440 from egg to adult and before hypoxia with *rars-1*(RNAi) after hypoxia during recovery  
597 (L4440/*rars-1*(RNAi)). Death was scored after each day of recovery. **B.** N2 incubated with *iftb-*  
598 *1*(RNAi) before and after, only before, or only after a 10 hour hypoxic exposure. **C.** Percentage  
599 dead after four days of recovery under the various conditions. Data are mean  $\pm$  sem of at least  
600 5 independent trials/condition. \*  $p < 0.05$  versus L4440/L4440 by two-tailed t-test. **D.** Short  
601 exposure to *iftb-1* and *rars-1* RNAi prior to hypoxia. Animals were grown to adults on OP50  
602 bacteria then exposed for 24 hours to empty vector (L4440), *iftb-1* RNAi, or *rars-1* RNAi then  
603 washed free of bacteria, incubated for 20 hours in hypoxia, recovered for 24 hours on OP50  
604 bacteria then scored. Data are mean  $\pm$  sem of 3 independent trials/condition. \*  $p < 0.05$  versus  
605 L4440 by two-tailed t-test.

606

607 **Figure 6** Correlations of lifespans of translation factor knockdown animals with oxygen  
608 consumption, translation rate, and hypoxia resistance. **A-H.** Lifespan measured from egg



609 onward. 50 animals/condition were scored with RNAi applied from egg onward. **I.** Median  
610 lifespans. \* -  $p < 0.01$  Log-rank test vs L4440 vector control. **J-L.** Lifespan does not correlate with  
611 hypoxic survival, FRAP, or oxygen consumption.

612

613 **Figure 7** Correlation of paraquat resistance with lifespan and hypoxic survival with translation  
614 factor knockdown. **A.** Kaplan-Meier curves were measured on 50 worms/condition to calculate  
615 median duration of survival on 4 mM paraquat agar plates. Worms were transferred to plates  
616 containing paraquat on day 7 after egg lay. \* -  $p < 0.01$  Log-rank text **B.** Survival duration on  
617 paraquat does not correlate with hypoxic survival. **C.** Survival duration on paraquat correlates  
618 significantly with lifespan.

619

620 **Figure 8** Correlation of tunicamycin resistance with hypoxic survival with translation factor  
621 knockdown or mutation. **A.** Percentage of animals reaching adulthood four days post  
622 embryonic stage on plates containing  $1 \mu\text{g ml}^{-1}$  tunicamycin. Data are mean  $\pm$  sem of six  
623 independent trials. \* -  $p < 0.01$ , Fisher's exact test. **B.** Tunicamycin resistance correlates  
624 significantly with hypoxia resistance.

625

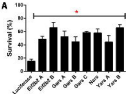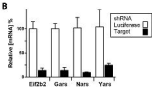

**A**

| Gene name     | Gene product                           |
|---------------|----------------------------------------|
| <i>ef2</i>    | EEF2, translation elongation factor    |
| <i>ef3a</i>   | EEF3A translation termination factor   |
| <i>fav-1</i>  | Phenylalanyl-tRNA synthetase           |
| <i>je-2</i>   | EIF4E cap binding protein              |
| <i>je-1</i>   | EIF4G cap binding protein              |
| <i>jeb-1</i>  | EIF2beta translation initiation factor |
| <i>nar-1</i>  | Asparaginyl-tRNA synthetase            |
| <i>nar-2</i>  | Arginyl-tRNA synthetase                |
| <i>rpl-6</i>  | Large ribosomal subunit L6 protein     |
| <i>rps-15</i> | Small ribosomal subunit S15 protein    |

**B**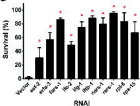

**A**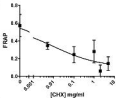**B**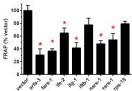**C**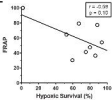

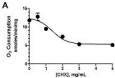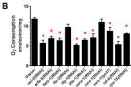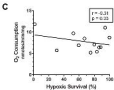

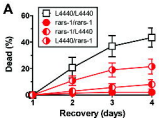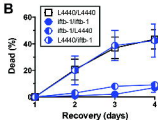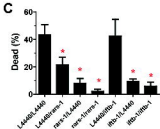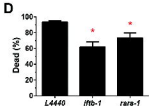

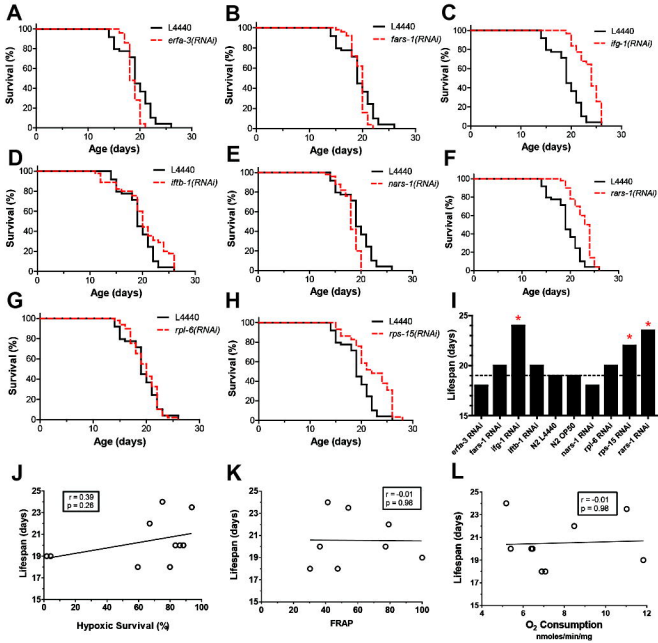

**A**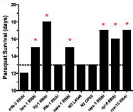**B**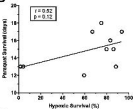**C**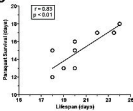



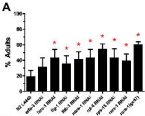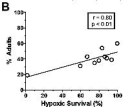

Source: https://cob.silverchair.com/jeb/article-pdf/doi/10.1242/jeb.082263/2036748/jeb_082263.pdf
